# Supplementary material for: Eukaryotic translation initiation factor 3 plays distinct roles at the mRNA entry and exit channels of the ribosomal preinitiation complex
Source: eLife. 2016 Oct 26;5:e20934. doi: 10.7554/eLife.20934 (PMC5153249; doi:10.7554/eLife.20934)
Supplement: Figure 2—source data 1. — DOI: http://dx.doi.org/10.7554/eLife.20934.006 [file elife-20934-fig2-data1.xlsx]

## Sheet: Sheet1
43S affinity (- mRNA, left panel)
	WT	H725P	R731I	Box6	Q258R	KLF	a/b/c	prt1-1	rnp1	∆8	Box37	∆60	GAP85	Box12-SPW
KD (nM) measurement 1	43	72	100	40	27	28	98	78	144	84	52	27	25	81
KD (nM) measurement 2	24	86	126	30	33	15	87	88	92	90	67	21	28	52
KD (nM) measurement 3									95
48S affinity (+ mRNA, right panel)
	WT	H725P	R731I	Box6	Q258R	KLF	a/b/c	prt1-1	rnp1	∆8	Box37	∆60	GAP85	Box12-SPW
KD (nM) measurement 1	37	63	45	43	33	51	106	96	136	89	77	41	41	81
KD (nM) measurement 2	38	62	55	33	64	54	111	112	180	88	90	52	35	57
