# Supplementary material for: Eukaryotic translation initiation factor 3 plays distinct roles at the mRNA entry and exit channels of the ribosomal preinitiation complex
Source: eLife. 2016 Oct 26;5:e20934. doi: 10.7554/eLife.20934 (PMC5153249; doi:10.7554/eLife.20934)
Supplement: Figure 3—source data 1. — DOI: http://dx.doi.org/10.7554/eLife.20934.010 [file elife-20934-fig3-data1.xlsx]

## Sheet: Sheet1
TC affinity (left panel)
	-eIF3	WT	H725P	R731I	Box6	Q258R	KLF	a/b/c	prt1-1	rnp1	∆8	Box37	∆60	GAP85	Box12-SPW
KD (nM) measurement 1	89.06	15.55	8.42	6.04	7.81	12.19	11.08	40.681	24.912	13.13	8.86	19.57	26.56	17.18	50.75
KD (nM) measurement 2	118.78	13.85	14.64	7.88	9.864	18.423	15.216	43.83	31.22	15.55	3.8	11.5	15.83	16	44.8
TC binding extent right panel)
	-eIF3	WT	H725P	R731I	Box6	Q258R	KLF	a/b/c	prt1-1	rnp1	∆8	Box37	∆60	GAP85	Box12-SPW
Extent measurement 1	116	103	88	77	94	104	91	107	100	80	91	88	86	85	53
Extent measurement 2	89	98	90	75	93	97	84	88	100	70	93	98	94	94	64
Extent measurement 3	103
