# Supplementary material for: Eukaryotic translation initiation factor 3 plays distinct roles at the mRNA entry and exit channels of the ribosomal preinitiation complex
Source: eLife. 2016 Oct 26;5:e20934. doi: 10.7554/eLife.20934 (PMC5153249; doi:10.7554/eLife.20934)
Supplement: Figure 4—source data 1. — DOI: http://dx.doi.org/10.7554/eLife.20934.012 [file elife-20934-fig4-data1.xlsx]

## Sheet: Sheet1
RPL41A recruitment kinetics (panel C)
	WT	H725P	R731I	Box6	Box37	∆8	prt1-1	rnp1	∆60	GAP85	Box12-SPW	Q258R	a/b/c	KLF
aparrent rate (min-1) measurement 1	0.29514	0.1103	0.083104	0.14935	0.22535	0.24064	0.044549	0.069509	0.17391	0.12416	0.1329	0.23455	0.023269	0.25403
aparrent rate (min-1) measurement 2	0.28691	0.10269	0.082226	0.12463	0.16958	0.18583	0.044621	0.08032	0.19414	0.12466	0.13187	0.20398	0.029908	0.20496
aparrent rate (min-1) measurement 3	0.2388	0.10586	0.081638	0.14135	0.17063	0.22051	0.048112	0.069301	0.22552	0.11466	0.095759	0.16299	0.0078537	0.22903
aparrent rate (min-1) measurement 4	0.23906
aparrent rate (min-1) measurement 5	0.2788
