# Supplementary material for: Eukaryotic translation initiation factor 3 plays distinct roles at the mRNA entry and exit channels of the ribosomal preinitiation complex
Source: eLife. 2016 Oct 26;5:e20934. doi: 10.7554/eLife.20934 (PMC5153249; doi:10.7554/eLife.20934)
Supplement: Figure 5—source data 1. — DOI: http://dx.doi.org/10.7554/eLife.20934.016 [file elife-20934-fig5-data1.xlsx]

## Sheet: Sheet1
		-eIF3	WT	H725P	R731I	Box6	Q258R	KLF	a/b/c	prt1-1	rnp1	∆8	Box37	∆60	GAP85	Box12-SPW
Fig. 5A
Extent measurement 1	midAUG	88.22	98.45	93.33	93.76	97.06	97.68	98.3	81.6	94.57	77.75	95.93	96.85	96.94	97.71	96.14
Extent measurement 2	midAUG	84.99	93.37	92.09	88.83	94.18	97.69	96.49	72.19	95.22	64.27	92.31	95.49	84.8	93.88	93.13
Extent measurement 3	midAUG	89.6	98.38	97.16	94.9	96.95	97.83	97.68	76.94	93.59	80.95	96.61	97.12	98.3	97.75	93.68
Fig. 5B
Extent measurement 1	5'5	68.15	84.09	58.16	57.7	62.48	80.26	84.73	32.11	79.89	69.4	91.72	82.51	87.89	80.12	85.34
Extent measurement 2	5'5	60.12	79.44	47.66	48.48	63.66	66.88	81.67	16.69	63.19	67.87	83.51	46.39	79.73	79.84	80.85
Extent measurement 3	5'5	74.48	91.82	64.37	59.8	69.22	83.74	87.8	28.86	81.93	69.79	91.27	86.21	84.03	84.35	89.37
Fig. 5C
Extent measurement 1	3'5	1.04	78.86	77.09	73.61	73.35	70.96	72.59	50.29	77.88	66.2	5.17	67.21	78.35	81.01	75.07
Extent measurement 2	3'5	1.02	80.04	72.09	64.02	63.18	64.08	75.28	43.07	81.15	68.52	4.72	76.57	84.1	75.85	85.01
Extent measurement 3	3'5	1.45	86.9	82	79.92	83.48	83.42	81.76	49.81	77.79	71.75	8.3	77.16	89.72	89.56	85.95
