# Supplementary material for: Eukaryotic translation initiation factor 3 plays distinct roles at the mRNA entry and exit channels of the ribosomal preinitiation complex
Source: eLife. 2016 Oct 26;5:e20934. doi: 10.7554/eLife.20934 (PMC5153249; doi:10.7554/eLife.20934)
Supplement: Figure 6—source data 1. — DOI: http://dx.doi.org/10.7554/eLife.20934.021 [file elife-20934-fig6-data1.xlsx]

## Sheet: Sheet1
Fig. 6A
Extent measurement 1	5'11	90.88	97.86	94.57	91.8	97.85	98.06	97.91	66.71	96.57	87.05	98.97	98.81	97.29	97.73	97.98
Extent measurement 2	5'11	86.5	96.47	95.92	92.15	96.2	97.53	97.6	73.98	95.83	84.19	97.73	97.77	93.09	96.35	97.06
Extent measurement 3	5'11	79.63	97.23			93.71	90.01	94.99	53.86	94.38	83.06	97.14	90.85	96.87	94.07	96.52
Fig. 6C
Extent measurement 1	3'11	25.22	95.25	94.36	93.14	94.24	91.69	94.7	43.86	92.76	80.38	29.6	92.46	90.93	91.92	91.44
Extent measurement 2	3'11	32.45	93.12	94.2	92.23	94.95	95.49	95.93	48.39	92.2	78.66	28.35	90.34	94.44	93.72	93.95
Extent measurement 3	3'11	26.01	94.19	91.9			90.45	90.68	44.64	86.92	75.76	25.36	89.58	86.26	84.77	92.14
Fig. 6C
Extent measurement 1	3'14	77.77	96.43									85.38	96.41	96.27
Extent measurement 2	3'14	58.9	97.6									88.1	96.46	94.79
Extent measurement 3	3'14	55.39	97.15									82.96
Fig. 6C
Extent measurement 1	3'17	71.44	97.19									89.89	93.22	96.02
Extent measurement 2	3'17	81.76	95.7									90.8	94.42	95.97
Extent measurement 3	3'17	72.59	93.02									90.19
Fig. 6C		amount of 43S-bound mRNA (% of WT)
mRNA	5´UTR length	1st exp	2nd exp
SME1	49 nts	62.3	65.8
PMP3	51 nts	70.7	66.8
RPL41A	23 nts	80	77
COX14	10 nts	78	81
RPS28A	13 nts	75.5	86
